# **TITLE**

Modeling and experimental determination of infection bottleneck and within-host dynamics of a soil-borne bacterial plant pathogen.

## **AUTHORS**

Gaofer Jiang<sup>1,2,#</sup>, Rémi Peyraud<sup>2,#</sup>, Philippe Remigi<sup>3</sup>, Alice Guidot<sup>2</sup>, Wei Ding<sup>1</sup>, Stéphane Genin<sup>2</sup> and Nemo Peeters<sup>2\*</sup>

## **ORCIDs:**

GJ: 0000-0002-5331-739X

RP: 0000-0002-7580-042X

PR: 0000-0001-9023-3788

AG: 0000-0001-5282-4157

WD: 0000-0001-8536-5233

SG: 0000-0003-2498-2400

NP: 0000-0002-1802-0769

## **AUTHOR AFFILIATION**

1-Laboratory of Natural Products Pesticide, College of Plant Protection, Southwest University, Chongqing, China.

2-LIPM, Université de Toulouse, INRA, CNRS, Castanet-Tolosan, France

3-New Zealand Institute for Advanced Study, Massey University, Auckland, New Zealand.

Tel: (33) 5 61 28 55 92; Fax: (33) 5 61 28 54 61.

# Contributed equally to this work

## **CORRESPONDING AUTHOR**

[Nemo.Peeters@toulouse.inra.fr](mailto:Nemo.Peeters@toulouse.inra.fr)

## **KEYWORDS**

Infection founding population, bottleneck, population dynamics; modelling; Tomato; *Ralstonia solanacearum* species complex; bacterial wilt; host-microbe interaction

# **ABSTRACT (250 words)**

The soil is known to be a very microbe-rich environment. Plant roots are surrounded by a complex microbiota among which, in warm climates, the pathogenic bacteria belonging to the *Ralstonia sp.* species complex. We used a combination of mathematical modelling and experimental plant infection methods, mimicking the natural conditions, to define the key parameters describing the infection, colonization and wilting of the host plant ("bacterial wilt" disease). Importantly, our model takes into account the possibility for the orthologous re-infection of already infected plants. We showed that it is the case in our experimental setup and likely to also happen *in natura*. We were able to model and experimentally measure the plant infection bottleneck, under these non-forced infection conditions. We then quantified to what extent the plant natural barriers can restrict (up to 50 times) this bottleneck size. We also measured the importance of the bacterial main virulence determinants (type III effectors) to allowing infection, as there is a reduction of the bottleneck by 70 times when the type III arsenal is absent. We further validated the model by predicting a strain's characteristics using only a few experimentally determined parameters. Finally the analysis of the global colonization dynamics allowed an accurate assessment of the *in planta* bacterial load triggering disease.

52 **SIGNIFICANCE STATEMENT (120 words)**

53 Animals and plants have a complex cohabiting microbiota. These microbes can be either beneficial or  
 54 deleterious to the host. We have modeled and experimentally measured the intimate interaction  
 55 between a plant host (tomato) and a pathogenic, soil-associated bacteria belonging to the *Ralstonia*  
 56 *sp.* species complex. We were able to evaluate how many bacteria are at the origin of the infection  
 57 and determine how the plant and the bacteria can impact on this bottleneck. Further within-host  
 58 bacterial dynamics analysis allowed to measure at what infection stage a plant would become  
 59 symptomatic. Since our experimental condition allows natural infection, as well as re-infection of  
 60 already infected plants, our global infection model should prove faithful to the *in natura* conditions.

61

## INTRODUCTION

As sessile organisms, plants can't extract themselves from their environment. Plant's natural openings (like stomata, hydathodes and root permeability) are required for the gas and solute exchange between the organism and its nutrient-providing environments (air, water and soil). At the same time, these environments are populated by a diverse microbiota, representing a constant source of plant inoculum of beneficial, commensal but also pathogenic microbes. Roots are particularly exposed as soil is known to be the most microbe-rich environment (1).

Not all pathogenic microbes present in a given environment will lead to a successful plant infection. Indeed infection and further colonization is dependent on the pathogen (*e.g.* virulence arsenal), the host (*e.g.* developmental and immunity traits) and the environmental conditions (*e.g.* temperature, hygrometry), as well as on the interactions between these parameters. These constraints that sharply limit the infecting population size create bottlenecks that will drastically influence population dynamics and the evolution of plant pathogens (2). Indeed, the bacterial genotypes that found the infecting population in the host plant (*i.e.* the founders) will determine the genetic makeup of subsequent generations within the host and also of future infections. A reduction in genetic variability is likely to create a founder effect within the post-bottleneck population (2). Moreover, plants are in constant interaction with the microbiota community, source of the pathogen population in their environment. This is especially true for plant roots, in close contact with the abundant soil microbiota, thus likely to face re-infections (*i.e.* homologous microbial infection) or superinfection (heterologous microbial infection) (3).

Infection bottlenecks have been evaluated by different means in several host-microbe systems. The methodologies used range from the analysis post-infection of a few marked quasi-species (4, 5), several wild-type isogenic tagged strains or WITS (6), or large sequence tag-based barcoded population (7). Increasing the number of tags is particularly suited for animal infection systems, as fewer individuals are needed. None of these studies, aiming at quantifying infection bottlenecks, actually use natural infection routes by exposing the individual hosts to an infectious

microbiota. Another layer of complexity comes from the dynamics of bacterial populations within the host. A global, quantitative analysis of the series of events occurring from infection to colonization and ideally to dissemination is currently lacking for most host-microbial pathogens systems (3). The exact assesment of all these parameters and their interactions should allow to identify the key parameters of an infection and understand their influence on population structure of pathogenic agents (8). Furthermore the bottleneck prediction and experimental determination was performed under non-forced, natural infection condition, including the possibility of subsequent re-infection.

Here, we quantified specific and key parameters of a plant pathogenic interaction using a disease modeling approach and then, predict and experimental measured the size of the infection bottleneck (or number of founders) of the pathogen. This work was conducted on the model bacterial soil-borne plant pathogen *Ralstonia sp.* to understand the global parameters of plant infection and colonization by a soil-borne pathogen (9). This bacterium infect its hosts through the roots and furthermore it is possible to complete its full life cycle in a reasonable amount of time: from a soil inoculation mimicking a natural infection to complete wilting and decay of the host plant (tomato) takes less than 2 weeks. In this work, we relied on this simple infection procedure followed by disease scoring and bacterial load measurements to model the whole life cycle of the pathogen. To our knowledge, our study is the first that provides a global modeling of the within-host population dynamics for a plant bacterial pathogen. Furthermore the bottleneck prediction and experimental determination was performed under non-forced, natural infection condition, including the possibility of subsequent re-infection.

## RESULTS

### Infection process modeling reveals multiple factors shaping the infection bottleneck size.

The life cycle of pathogenic *Ralstonia sp.* in host plant can be divided in five subsequent steps (Fig. 1): 1) root invasion, 2) passage through the root cortex, 3) proliferation within the xylem vessels, 4) a phenotypic switch, inducing exopolysaccharide (EPS) production, and 5) wilting of aerial organs

leading to the killing of the plant and allowing pathogen transmission to the soil. In order to identify how those steps influence the infection founders (F) upon a prolonged exposure of the plant to the pathogen (allowing subsequent re-infection events (3)), we designed a mathematical model that reproduces the bacterial population (B) dynamics upon these 5 steps (See SI Appendix, Method S1, for the details of this model). We investigated the impact of the model parameters on the infection bottleneck size of *Ralstonia pseudosolanacearum* strain GMI1000. Five of these parameters lead to a reduction of the amount of founders when their value increased. These parameters are: i) the plant-pathogen association constant (K, Fig. 2A), ii) the reduction of the maximum entry flow over time (z, Fig. 2C), iii) the growth rate in xylem ( $\mu$ , Fig. 2D), iv) the quorum sensing threshold (Q, Fig. 2E), and v) the steepness of plant wilting response to EPS concentration ( $\alpha$ , Fig. 2F).

Overall, the number of founders is determined by a trade-off between bacterial entry flow into the roots (controlled by K,  $V_{fmax}$  and z) and the wilting kinetics (controlled by  $\mu$ , Q and  $\alpha$ ). For K and z the decrease of the number of founders is due to a reduction of an effective entry flow of cells. On the other hand increasing parameters  $\mu$ , Q and  $\alpha$ , leads to a delayed transmission phase and thus reducing the amount of bacteria entering from subsequent re-infections. However, the maximum number of successful founders can dramatically increase the final founder flow value ( $V_{fmax}$ , Fig. 2B). Interestingly, this last parameter represents the strength of the plant bottlenecks, *i.e.* the plant barrier and the immune system clearance. Hence, we identified that the strength of these two bottlenecks can represent the highest sources of founders' variability even if the within-host population dynamics also plays a role.

# **Experimental quantification of key parameters of the tomato infection by *Ralstonia pseudosolanacearum* strain GMI1000**

We sought to experimentally determine the values of the key parameters mentioned above in order to quantitatively predict the size of the infection bottleneck. We hypothesized that plants could be

re-infected by the soil-inoculated pathogen. To test this in tomato, we performed non-simultaneous inoculations with two equally virulent strains (SI Appendix, Fig. S1A) of *R. pseudosolanacearum*, the wild type strain GMI1000 and the gentamicin-resistant derivative GRS540 (SI Appendix, Fig. S2A). Tomato plants were soil-inoculated with GMI1000 and re-infected with GRS540 at 1, 8, 23 and 48 hours after the first inoculation (hours post-infection or hpi). Check the presence of GRS540 in the bacterial load at 5 dpi showed that 60% of the plants had been re-infected when the second inoculation occurred at 23 hpi. Only few re-infections were detected at 48 hpi. Hence, the capacity of subsequent infection decreased over time at a rate of  $2 \pm 0.1 \text{ \% h}^{-1}$  (Fig. 3A).

Next, the median infection dose (MID) of *R. pseudosolanacearum* was quantified to evaluate the infectivity of *R. pseudosolanacearum* in tomato (Fig. 3B) using the method of Reed and Muench (10). The MID corresponds to the bacterial inoculums that trigger disease for, at least 50%, of the inoculated plants (SI Appendix, Fig. S3). The MID gradually declined until 10 dpi to an asymptotic value of  $5.9 \cdot 10^6$  cells (Fig. 3B). To ensure that the MID is a feature of the soil-root interface, we performed a similar assay but using stem injection to bypass the roots (SI Appendix, Fig. S4). Here, the MID<sub>stem</sub> was only  $4.1 \cdot 10^3$  bacteria at 5 dpi (SI Appendix, Fig. S4D).

In order to evaluate bacterial growth rate in the stem, the bacterial load in infected plants was quantified at different times following root infection (Fig. 4A). Fitting data points between days 2 and 5 yielded an exponential growth rate of  $0.196 \text{ h}^{-1} \pm 0.039$  ( $R^2 = 0.42$ ) (SI Appendix, Fig. 5B). The weakness of the correlation coefficients results from the intrinsic variability of the timing of the first infection associated with soil inoculations procedures. In order to address this, the same experiment was repeated using a stem inoculation procedure. We found a growth rate at  $0.233 \pm 0.012 \text{ h}^{-1}$  ( $R^2 = 0.928 \pm 0.024$ ) (Fig. 4B), which is in the range of the *in vitro* growth rate in minimal medium:  $0.253 \text{ h}^{-1} \pm 0.034$  ( $R^2 = 0.97 \pm 0.02$ ) (SI Appendix, Fig. S5A).

During the above experiment (Fig. 4A), the disease index (DI) of each plant was also recorded. This DI scoring uses a 0 to 4 scale representing each a quartile of total plant leaf wilting; from 25%

leaves wilted (DI = 1), to 100%, or complete wilting (DI = 4). Symptomatic plants (DI > 0) have a bacterial load ranging from  $10^8 \text{ cfu} \cdot \text{g}_{(\text{FW})}^{-1}$  to  $10^{11} \text{ cfu} \cdot \text{g}_{(\text{FW})}^{-1}$  (Fig. 5A), with the notable exception of a few dried-out plants that had reached DI = 4, several days before bacterial load assessment (SI Appendix Fig. S6, S7). The dataset was used to identify the *in planta* bacterial threshold triggering plant symptoms. We used a two class classifier, predicting wilting onset (DI > 0) or not if the bacterial load exceed a threshold (q) and compared the predictor performance in experimental value for various threshold levels. The Matthews correlation coefficient (MCC) (11), which is a measure of the quality of a predictor, was used to find the best threshold value. A maximum MCC value of 0.896 was obtained (SI Appendix, Fig. S8) for a bacterial threshold of  $6.10^7 \pm 0.97.10^7 \text{ cfu} \cdot \text{g}_{(\text{FW})}^{-1}$ .

We further exploited this large data set of more than 500 individual infected plants scored for bacterial load and symptoms to extrapolate the wilting time response to the EPS production in tomato plants. For this purpose, all wilting kinetics of diseased individuals were synchronised to the first day when wilting symptoms were observed (Fig. 5B). The steepness,  $\alpha$ , of the fitted wilting time response curve was:  $0.612 \pm 0.012$ . Then, we determined using the equation 4 the *in planta* EPS concentration from the known flux of EPS production,  $V_{\text{EPS}}$ , of *R. pseudosolanacearum* (Peyraud *et al.* submitted) and the measured bacterial load and growth rate. This EPS concentration over time was used to assign the scaling factor,  $\beta = 2.31$ , to obtain the wilting dose response curve to the EPS concentration.

Finally, we determined the reduction of the proliferation,  $\mu^-$ , due to the collapse of the host tissues at late infection. From measured data of advanced wilting symptoms and bacterial load we fitted a value of  $0.25 \text{ h}^{-1}$ .

## **Prediction and experimental measurement of the infection bottleneck size for *Ralstonia pseudosolanacearum* strain GMI1000**



The above experimentally defined parameters, namely  $K = 5.9 \cdot 10^6$ ,  $z = 0.02$ ,  $\mu = 0.23$ ,  $q = 6 \cdot 10^7$ ,  $\alpha = 2.31$ ,  $\beta = 0.612$  and  $\mu^- = 0.25$ , were used as input in the mathematical model in order to predict the size of the infection bottleneck for *R. pseudosolanacearum* strain. First we estimated the maximum effective entry flow of founders,  $V_{\text{fmax}}$ , from fitting the model prediction to experimental wilting onset data (extracted from Fig. 4A data). We found  $V_{\text{fmax}}$  to be in the range of 5 to 22 cells·h<sup>-1</sup>. The model predicts that the actual number of founders at 7 dpi should be in the range of 90 to 476 for an inoculum at  $5 \cdot 10^7$  cell·ml<sup>-1</sup>.

We then experimentally determined the size of the infection bottleneck, i.e. the number of founders ( $N_i$ ) in tomato using a simple statistical method based on the co-infection of GMI1000 mixed with minute fractions (from 1% to less than 0,1%) of the gentamycin-marked strain GRS540. Importantly, both strains were shown to be of equal fitness *in planta* (SI Appendix, Fig. S1). The probability of an infected plant to also contain the marked strain is directly correlated with the proportion of the marked strain in the original inoculum ( $p < 1\%$ , see Materials and methods) and the size ( $N_i$ ) of the infection bottleneck. Sets of 32 plants were inoculated with a given GMI1000/GRS540 ratio ( $p$ ). The resulting proportion of plants infected by GRS540 was then used to generate a single estimation of  $N_i$  through a probabilistic analysis (see M&M and SI Appendix, Fig. S9). After extensive, 60 independent inoculations of sets of 32 plants, the median of  $N_i$  was estimated to be 458 cells (SI Appendix Fig. S10). We observed a high variability of  $N_i$  with a two times standard deviation of 2734 cells. This variability could reflect the true biological variability of  $N_i$ , however it may also arise from the stochastic sampling of the marked strain inherent to our experimental setup. Thus, in order to evaluate the contribution of a stochastic sampling of the marked strain on  $N_i$  variation, we simulated a random sampling based on the same parameters as the experimental setup (number of plants, concentration of marked strain in inoculum). For a true  $N_i$  value of 458 the stochasticity analysis gave a median  $N_i$  of 454 cells (SI Appendix Fig. S10), with a two times standard deviation of 507 cells. Hence, we evaluated that the stochasticity of individual sampling due to our experimental setup could represent up to 18% (507/2734) of the variability observed in the experimental  $N_i$  estimation.

## Plant physical barriers and pathogen type III effectors are major drivers of the infection bottleneck size.

We used a wounded-root inoculation procedure to estimate the contribution of plant natural root barriers to the infection bottleneck size. At 4 dpi, all wounded-root plants had symptoms, indicating an accelerated infection and colonization. We used the same methodology of mixed inoculations to determine the impact of wounding on the infection bottleneck size ( $N_{WT-wounding}$ ). We were able to show that  $N_{WT-wounding}$  dramatically increased to a median of 24215 cells (Fig. 7, blue circles), significantly larger than  $N_{WT}$  (median of 458 cells) as previously defined (Mann Whitney test, P-value < 0.0001). Analysis of variation in model parameters which fits such high  $N_i$  values and earliest symptoms onset (4 days), reveals that a high entry flow,  $V_{fmax}$ , around 1065 cells·h<sup>-1</sup> likely occurred in addition to the reduction of the delay time,  $d$ , to cross root cortex.

We then treated tomato plants with an *hrp* mutant (*R. pseudosolanacearum* strain GMI1694, *hrcV* mutant) and its isogenic gentamycin-marked strain (GRS743, SI Appendix Fig. S1B), to evaluate the impact of a complete loss of bacterial type III secretion on the infection bottleneck size. Tomato plants were harvested at 10 dpi in order to maximize the colonization of plants by the *hrp* defective *R. pseudosolanacearum* strain. Here, the infection bottleneck size of the *hrp* mutant,  $N_{hrp}$ , was estimated at a median of 6 cells (and mean of  $7 \pm 4$  cells, Fig. 7, green squares), significantly lower than  $N_{WT}$  (Mann Whitney test, P-value = 0.0014).

## Using the model to infer life-history traits of a bacterial mutant

The results obtained so far indicated that our model is able to correctly predict the size of the infection bottleneck from a few key parameters that were determined experimentally. We wondered if the model could be used with the opposite goal, *i.e.* inferring a strain's characteristics from a measured number of founders. In *R. pseudosolanacearum*, the type III secretion system (or TTSS) is

required for bacteria to enter xylem vessels (12). A mutant in the TTSS apparatus (*hrp* mutant) is unable to kill plants, but can sustain a limited population sizes in xylem vessels (13). We therefore combined the wounding procedure and the inoculation with the *hrp* strains. Samples were harvested to estimate the number of founders of a *hrp* mutant by wounding ( $N_{hrp\_wounding}$ ) at 7 dpi. The founder amount increased to a mean of  $62 \pm 40$  cells and a median of 53 cells. The mean of  $N_{hrp\_wounding}$  was about 9 times higher than  $N_{hrp}$  (P-value = 0.019) but 482 times lower than  $N_{WT\_wounding}$  (P-value = 0.0006).

We used these data to infer the strength of the immune system clearance on the entering bacterial cells and the *in planta* growth rate for GMI1694. The entry flow of founders,  $V_{fmax(hrps\_wounding)}$ , was estimated to be around  $3 \text{ cells} \cdot \text{h}^{-1}$ . Thus, if considering that the entry flow in wounded roots of the *hrp* mutant is similar to the wt ( $1065 \text{ cells} \cdot \text{h}^{-1}$ ) and that the succesfull founder flow corresponds to the survivors to the immune system response, we found that the strength of the immune system clearance was 99.7% of the entered cells. Comparison between the founding number of the wt, 458, and the *hrp* mutant strain, around 6, leads to a similar value, 98.7 %. Then, we estimated the maximal growth rate of GMI1694 by considering that no symptoms occurs and thus bacterial load remains below the quorum sensing treshold,  $q$ , for both intact and wounded root conditions. We found that the maximal growth rate *in planta* should be in the range of  $0.9$  to  $0.11 \text{ h}^{-1}$ . We experimentally tested this prediction by measuring the growth rate of the GMI1694 strain in stem xylem using the stem injection procedure (SI Appendix, Fig. S11) and found a growth rate of  $0.112 \pm 0.005 \text{ h}^{-1}$ , with  $R^2 = 0.873 \pm 0.06$ . Hence, the clearance of the *hrp* mutant bacteria by the plant immune system in the stem was evaluated to be at a maximum of 52 %.

## DISCUSSION

Our objective in this work was (i) to model the plant infection process and the within-host bacterial population dynamics, (ii) predict and experimental measure the infection bottleneck size for *R. pseudosolanacearum* strain GMI1000 on tomato and finally, (iii) to understand the factors that participate to the bacterial infection bottleneck. For this purpose we used a natural, soil-drenching, plant infection bioassays. Plants were scored for disease appearance (bacterial wilt) and bacterial load. The lowest level of bacterial soil saturation to obtain reliable wilting (> 50%) in our conditions (12 days), is asymptotic to a value of  $6.10^6$  cfu·ml<sup>-1</sup> of inoculum (see Fig. 3B). In our experimental setup this equates to a  $4.6 \cdot 10^6$  cfu·g<sup>-1</sup> Dry Weight soil inoculum, comparable to the  $10^5$ - $10^7$  cfu·g<sup>-1</sup> Dry Weight of soil detected in the rhizosphere of diseased tomato plants in the field (14). We also showed that there is a potential for subsequent re-infection, over a time frame of 24-48 h (see Fig. 3A). The success of these further re-infections is likely to be dependent on the density of the local inoculums which can decline other time (15) and on the interaction between the host immune response and the bacterial virulence arsenal. Indeed, the lowering of the re-infection probability with time (see Fig. 3A) could be correlated with the onset of plant immune responses (13).

We showed (Fig. 5A) that asymptomatic plants are displaying different levels of bacterial colonization whereas diseased plants are always well colonized (> $10^8$  cfu/gFW). We further refined this relationship by analyzing the large data set of individual plants for which we have obtained both the disease score and the bacterial count. We were able to determine the *in planta* bacterial load ( $6.10^7$  CfU/g FW) that would be the best predictor of later wilting (see SI Appendix, Fig. S8). As *Ralstonia* sp. plant pathogenic strains are restricted to the xylem vessels of plants, representing probably less than a 1/10 of the volume/weight of a stem, we could consider our *in planta* experimental validation as being in the same range as the threshold ( $10^7$ - $10^8$  cfu/ml) determined to trigger EPS production *in vitro* (16).

In order to understand and determine all the important parameters of the life cycle of pathogenic *Ralstonia sp.*, we built a model that captures the global life cycle of the bacterium from infection to dissemination in the environment after complete wilting of the host plant. We experimentally estimated the size of the infection bottleneck (*i.e.* the number of founders) by a probabilistic approach evaluating the presence/absence of a marked strain in the colonized plants at the earliest stage possible. This experimentally determined number of founders (median  $N_i$  = 458 cells) was obtained after the analysis of a large number of individual plants and is in the same range as the one predicted from the model ( $N_i$  = 90 to 476). To our knowledge, it is the first determination of the host-bacterial pathogen infection bottleneck that takes into account re-infection in an experimental system mimicking natural infection.

The quantification of this bottleneck imposed by the plant on the bacterial population present in the soil is required to evaluate the possibility of a “founder effect”. This latter is defined as a bottleneck too narrow to allow the genetic diversity of the infecting population to mirror the genetic diversity of the soil resident population, leading to a potential genetic drift. The *Ralstonia solanacearum* Species Complex (RSSC) has a wide species-to-continent geographic distribution (**17**). Some studies show that diversity analysis of single isolates from different infected plants can yield up to 42-51 haplotypes mainly from 2 RSSC species (*R. solanacearum* and *R. pseudosolanacearum* formerly defined as phylotypes II and I (**17**)) over a narrow geographical distribution (**18, 19**). So far no studies have explored the RSSC population diversity in the soil of planted fields, thus it is not possible to establish whether the size of the infection bottleneck as determined in this work for the GMI1000 strain would *per se* result in a genetic drift or not. In addition, in this study, the infection bottleneck was measured using a clonal population (individuals of the same clone, GMI1000 and isogenic marked strain). However, in a local natural population, different bacterial genotypes could also contribute to the infection bottleneck size (*i.e.* presence of strains with different virulence arsenals, different metabolic capacities). Studying the contribution of different bacterial genotypes to the infection bottleneck size would be an interesting question for future studies. An interesting corollary of

bottleneck restriction during infection is related to kin selection. Indeed one could imagine that the restriction imposed by the bottleneck will prevent (or reduce) the infection by non-kin bacteria. This would limit the super-infection by opportunistic microbes or re-infection by kin-cheaters, generating a highly related infecting population (**3, 20**). Studying the ability of different bacterial genotypes to alter bottleneck sizes in isolation or within diverse (multi-strain or multi-species) communities will/would be an interesting question for future studies.

In this study we also evaluated the effect of plant and bacterial parameters on the size of the infection bottleneck. As expected, the bottleneck size increased significantly (> 50 times) after mechanically wounding the roots. We also showed that this bottleneck was dramatically reduced (> 70 times), when plants were infected with a *hrp* mutant, devoid of any type III effectors, and known to produce symptomless but colonized plants (**13**). This later result shows that type III effectors are collectively required to establish the first infecting front, like previously shown for specific type III effectors in an *in vitro* infection model (**21, 22**). We can hypothesize that one of the prevalent role of these virulence determinants would be to suppress plant immunity, but we can't rule out their role in nutrient mobilization, even at these early infection stages. Finally, we tested the prediction power of our global infection model by testing the predicted *in planta* growth rate of the *hrp* mutant strain when inoculated on wounded plants. As the experimentally measured growth rate fits with the predicted maximal growth rate, our starting hypothesis of same entry flow (in wounded-root plants) but greater clearance of the *hrp* mutant bacteria by the plant immune system holds true. Several important questions are still unresolved regarding the parameters controlling the size of the infection bottleneck (**2**) during the infection of tomato plants by *Ralstonia sp.* In particular it would be interesting to evaluate variation in the infection bottleneck size with the plant root status, both in term of root growth (young vs old plants) and in terms of root developmental plasticity (*e.g.* in different type of soils). At a smaller scale even, one could imagine that there could be specific bottlenecks for the bacteria to cross several distinct cell layers within the root organ (**12**), like it was shown for the progression of the anthrax bacteria in different murine tissues (**4**). Another level of

336 complexity would be to understand the contribution of the microbiome to this bottleneck.  
 337 Specifically, it would be interesting to evaluate whether the protection of plants from bacterial wilt  
 338 by trophic competition **(15)** could partly be explained by an “infection-site crowding” thus inducing a  
 339 likely reduction in the infection bottleneck size.

340

341

342

## MATERIAL AND METHODS

### Infection model

We designed a mathematical model of the infection kinetics to describe the population dynamics of *R. pseudosolanacearum* and the founder number within the xylem. The model is composed of 3 compartments (c), the soil (s), the root cortex (r), and the xylem (x). The volume dimension of the model was set in ml, since it corresponds to the concentration of cells using soil drenching methods, and the bacterial load measured in g (fresh weight) which can be assumed to be in the range of 1 ml volume. The variables are the concentration of the bacterial cells  $B_c$  within the 3 compartments (in  $\text{cell}\cdot\text{ml}^{-1}$ ), the founder number,  $F$ , in the root cortex,  $F_r$ , and xylem,  $F_x$ , (in  $\text{cell}\cdot\text{ml}^{-1}$ ), the EPS concentration in xylem,  $\text{EPS}_x$ , (in  $\text{mmol}\cdot\text{ml}^{-1}$  of N-acetylglucosamine), the wilting level of the plant,  $W$ , (in DI).  $B$  and  $F$  can be in the magnitude of few cells in tissues, thus we used entire value for these variables. The equations, described in the supplementary information, are solved numerically with a time step of 1 hour. The transmission time was defined as the time when the wilting symptom reaches  $\text{DI} > 3.5$ . When no wilting level above 3.5 is reached after 30 days, this time point is taken for the evaluation of the infection bottleneck.

### Bacterial strains, plant material and culture conditions

The *R. pseudosolanacearum* strains used in this work were: GMI1000, the wild-type strain; GRS540, a derivative strain from GMI1000 with a gentamicin cassette insertion (23); GMI1694, a type III secretion system mutant (*hrcV* mutant) with spectinomycin cassette insertion (24); GRS743, a derivative strain from GMI1694 with the integration of the gentamicin cassette of GRS540 (this study). The gentamicin cassette does not alter the pathogen fitness, as was previously shown by stem injection (23) and SI Appendix, Fig. S1. *R. pseudosolanacearum* strains were routinely grown at 28 °C in complete BG medium (25). Antibiotics were used at the following final concentrations: 10  $\mu\text{g}\cdot\text{L}^{-1}$  gentamicin and 40  $\mu\text{g}\cdot\text{L}^{-1}$  spectinomycin. *Solanum lycopersicum* var. Super Marmande was cultivated in greenhouse. Square trays (30×30×4.5 cm) were used to grow 16 tomato seedlings and



kept in the greenhouse under the following conditions: 75% humidity, 12 h light 28 °C, and 12 h darkness 27 °C. Plants were inoculated after 4 weeks of growth in dedicated quarantine facilities.

# **Determination of the median infection dose**

Wild-type *R. pseudosolanacearum* GMI1000 was used to determinate the median infection dose (MID) in tomato. Groups of 16 tomato plants in one tray were soil-drenching inoculated with  $5.10^8$ ,  $5.10^7$ ,  $5.10^6$ ,  $5.10^5$  or  $5.10^4$  cfu·ml<sup>-1</sup> in 500 ml of bacterial suspension. For stem injection, 10 µl of bacterial suspensions was directly injected into stem with a microsyringe (Hamilton, Reno, NV, U.S.A.) at the level of the cotyledon. The injection inoculums were diluted to  $5.10^7$ ,  $5.10^6$ ,  $5.10^5$ ,  $5.10^4$  and  $5.10^3$  cfu·ml<sup>-1</sup> of *R. pseudosolanacearum*. Symptom appearance was scored daily for each plant. Disease index (DI) was used to describe the observed wilting: 0 for no wilting; 1 for 25% of leaves wilted; 2 for 50%; 3 for 75% and 4 for complete wilting. Symptom onset (DI > 0) was defined as an infection success of *R. pseudosolanacearum* in tomato. The MID of *R. pseudosolanacearum* in tomato was used at the 50% endpoint method of Reed and Muench (10). First, we calculated the Reed and Muench index (RMI) for the 50% endpoint from these dilutions. The obtained RMI was then corrected by the dilution factor.

$$RMI = \frac{(\% \text{ infected at dilution immediately above } 50\%) - 50\%}{(\% \text{ infected at dilution immediately above } 50\%) - (\% \text{ infected at dilution immediately below } 50\%)}$$

Logarithm of MID = (logarithm of the dilution above 50% infection) + RMI×dilution factor.

Each treatment had two technical repeats and three biological repeats with 96 plants in total.

# **Monitoring of bacterial colonization kinetics and *in planta* growth rate.**

The soil-drenching inoculation was performed using GMI1000 at  $5.10^7$  cfu·ml<sup>-1</sup>. Symptoms were recorded before harvest as described above. Sixteen plants were sampled at each dpi and this experiment was repeated three times with 48 samples in total. For the stem injection procedure, each plant was injected with 10 µl bacterial solution containing  $5.10^6$  cfu·ml<sup>-1</sup> of GMI1000. Sampling was conducted straight away after injection (0hpi), 7 hpi, 24 hpi and 52 hpi. Each sampling had 4 plants and this experiment was repeated 8 times with 32 samples in total. The 1 cm stem from the

cotyledons upwards was harvested, weighed, and homogenized by mechanical disruption in a grinder (Retsch France, 95610 Eragny sur Oise, France). Bacteria were then enumerated by plating serial dilutions on BG agar plates, using an easyspiral (Interscience, Saint Nom la Breteche, France).

# **Prediction of bacterial threshold to induce symptom.**

The following relation was used to predict wilting onset  $W$  ( $W=1$ ) or no wilting ( $W=0$ ) depending on the bacterial load  $b$ , in  $\text{cfu}\cdot\text{ml}^{-1}$ , *in planta*.

$$W = 1 \text{ if } b > t \text{ then } W = 0$$

With  $t$ , the threshold above which the wilting onset occurs. Two-class contingency matrices with experimental and simulated data were generated for changing values of  $t$ . The Matthews Correlation Coefficient (11) (MCC) was used to compare predicting capacities of  $t$ . The MCC can range from 0 (random assignment) to 1 (perfect prediction).

# **Estimation of the size of the infection founding population ( $N_i$ )**

A method was developed to quantitatively estimate the size of the *R. pseudosolanacearum* infection founding population in tomato, or  $N_i$ . The method is based on the measurement of the proportion of plants infected with a gentamycine marked strain when the host was inoculated with a mixture of two strains, the wt strain plus various small (0.1% to 0.01%) proportion of a marked strain. The starting frequency of the marker strain in the inoculum,  $p$ , was measured by serial plating. The frequency of the wt strain being  $1 - p$ .  $R$  is referred to as the event that at least one cell of the resistant bacteria individual is present in the host plant.  $P(R)$  is the probability of the event  $R$ .  $NR$  is considered as the event that only the wt (Non-Resistant) strain is present.  $P(NR)$  is the probability of the event  $NR$ . Thus,  $P(R)+P(NR)=1$ . Based on the above:  $P(NR) = (1 - p)^{N_i}$  and  $P(R)=1 - (1 - p)^{N_i}$ . And  $N_i = \log(1 - P(R)) / \log(1 - p)$ . SI Appendix, Fig. S9 highlights the sigmoid feature of  $N=f(P)$  for each given  $p$ .  $N_i$ , or “infection bottleneck” can be estimated from this expression through investigating  $P(R)$  experimentally as follows: The resistant, marked strains are GRS540 or GRS743, and their respective non-marked isogenic strains are GMI1000 and GMI1694 (*hrp* mutant). The sampling time

was at 7 dpi for root inoculation of GMI1000 and GRS540, 4 dpi for wounding inoculation of GMI1000 and GRS540, 10 dpi for inoculation of GMI1694 and GRS743 and 7 dpi for wounding inoculation of GMI1694 and GRS743. Stem samples were collected as described before and appearance of the two strains was determined by plating on BG agar with and without antibiotics. The two extreme output value of  $N_i$ , *i.e.*  $N_i = 0$  and  $N_i = \text{infinity}$ , respectively obtained when  $P(R) = 0/32$  or  $P(R) = 32/32$  were excluded from the analysis as they artificially skew the estimation of  $N_i$ . Indeed these limit values are the two asymptotes of the sigmoid curve of  $N = f(P)$  (see SI Appendix Fig. S9)

#### ACKNOWLEDGEMENTS

GJ was supported by China Scholarship Council (No. [2013] 3009) and TECHNO II Erasmus Mundus Programme (2015-2016). RP was supported by EMBO (Long-Term Fellowship ALTF 1627-2011) and Marie Curie Actions (EMBOCOFUND2010, GA-2010-267146). This work was performed with funding from the LABEX "TULIP" (ANR-10-LABX-41). We also thank our colleagues for useful discussions. The funding bodies played no role in study design, data collection and analysis, decision to publish, or preparation of the manuscript.

#### AUTHORS CONTRIBUTION

GJ, RP, PR and NP designed the research, GJ, RP performed research, GJ, RP, AG, SG and NP analyzed data, GJ, RP, PR, AG, SG, WD and NP wrote the paper. All authors have read and approved the manuscript for publication. GJ and RP contributed equally to the work.

## REFERENCES

1. Zarraonaindia I, et al. (2015) The soil microbiome influences grapevine-associated microbiota. *mBio* 6(2):e02527–14–10.
2. Abel S, Abel Zur Wiesch P, Davis BM, Waldor MK (2015) Analysis of Bottlenecks in Experimental Models of Infection. *PLoS pathogens* 11(6):e1004823.
3. Gog JR, et al. (2015) Seven challenges in modeling pathogen dynamics within-host and across scales. *Epidemics* 10:45–48.
4. Plaut RD, Kelly VK, Lee GM, Stibitz S, Merkel TJ (2012) Dissemination bottleneck in a murine model of inhalational anthrax. *Infection and immunity* 80(9):3189–3193.
5. Pfeiffer JK, Kirkegaard K (2006) Bottleneck-mediated quasispecies restriction during spread of an RNA virus from inoculation site to brain. *Proc Natl Acad Sci USA* 103(14):5520–5525.
6. Grant AJ, et al. (2008) Modelling within-Host Spatiotemporal Dynamics of Invasive Bacterial Disease. *PLoS biology* 6(4):e74–14.
7. Abel S, et al. (2015) Sequence tag-based analysis of microbial population dynamics. *Nature Methods* 12(3):223–226.
8. Louie A, Song KH, Hotson A, Thomas Tate A, Schneider DS (2016) How Many Parameters Does It Take to Describe Disease Tolerance? *PLoS biology* 14(4):e1002435.
9. Peeters N, Guidot A, Vailleau F, Valls M (2013) *Ralstonia solanacearum*, a widespread bacterial plant pathogen in the post-genomic era. *Molecular Plant Pathology* 14(7):651–662.
10. Reed LJ, Muench H (1938) A simple method of estimating fifty per cent endpoints. *Am J Epidemiol* 27(3):493–497.
11. Matthews BW (1975) Comparison of the predicted and observed secondary structure of T4 phage lysozyme. *Biochimica et biophysica acta* 405(2):442–451.
12. Vasse J, Genin, S., Frey P, Boucher C, Brito B (2000) The *hrpB* and *hrpG* regulatory genes of *Ralstonia solanacearum* are required for different stages of the tomato root infection process. *Molecular plant-microbe interactions: MPMI* 13(3):259–267.
13. Feng D-X, et al. (2012) Biological control of bacterial wilt in *Arabidopsis thaliana* involves abscissic acid signalling. *New Phytol* 194(4):1035–1045.
14. Horita M, Tsuchiya K (2005) Diversity of *Ralstonia solanacearum* in Tomato Rhizosphere Soil. *Bacterial Wilt Disease*, eds Prior P, Allen C, Elphinstone J (Allen, C. Prior, P. Hayward, A.C.).
15. Wei Z, et al. (2015) Trophic network architecture of root-associated bacterial communities determines pathogen invasion and plant health. *Nature communications* 6:8413.

16. Clough SJ, Flavier AB, Schell MA, Denny TP (1997) Differential Expression of Virulence Genes and Motility in *Ralstonia* (*Pseudomonas*) *solanacearum* during Exponential Growth. *Applied and Environmental Microbiology* 63(3):844–850.
17. Safni I, et al. (2014) Polyphasic taxonomic revision of the *Ralstonia solanacearum* species complex: proposal to emend the descriptions of *Ralstonia solanacearum* and *Ralstonia syzygii* and reclassify current *R. syzygii* strains as *Ralstonia syzygii* subsp. *syzygii* subsp. nov., *R. solanacearum* phylotype IV strains as *Ralstonia syzygii* subsp. *indonesiensis* subsp. nov., banana blood disease bacterium strains as *Ralstonia syzygii* subsp. *celebesensis* subsp. nov. and *R. solanacearum* phylotype I and III strains as *Ralstonia pseudosolanacearum* sp. nov. *Int J Syst Evol Microbiol* 64(Pt 9):3087–3103.
18. Ramsubhag A, et al. (2012) Wide genetic diversity of *Ralstonia solanacearum* strains affecting tomato in Trinidad, West Indies. *Plant Pathology* 61(5):844–857.
19. Lin CH, Tsai KC, Prior, P., Wang J-F (2014) Phylogenetic relationships and population structure of *Ralstonia solanacearum* isolated from diverse origins in Taiwan. *Plant Pathology* 63:1395–1403.
20. van Leeuwen E, O'Neill S, Matthews A, Raymond B (2015) Making pathogens sociable: The emergence of high relatedness through limited host invisibility. *The ISME journal*. doi:10.1038/ismej.2015.111.
21. Turner M, et al. (2009) Dissection of bacterial Wilt on *Medicago truncatula* revealed two type III secretion system effectors acting on root infection process and disease development. *Plant Physiology* 150(4):1713–1722.
22. Wang K, et al. (2015) Functional Assignment to Positively Selected Sites in the Core Type III Effector RipG7 from *Ralstonia solanacearum*. *Molecular Plant Pathology*:n/a–n/a.
23. Guidot A, et al. (2014) Multihost experimental evolution of the pathogen *Ralstonia solanacearum* unveils genes involved in adaptation to plants. *Molecular Biology and Evolution* 31(11):2913–2928.
24. Cunnac S, Occhialini A, Barberis P, Boucher C, Genin S (2004) Inventory and functional analysis of the large Hrp regulon in *Ralstonia solanacearum*: identification of novel effector proteins translocated to plant host cells through the type III secretion system. *Molecular Microbiology* 53(1):115–128.
25. Plener L, Boistard P, González A, Boucher C, Genin S (2012) Metabolic adaptation of *Ralstonia solanacearum* during plant infection: a methionine biosynthesis case study. *PLoS One* 7(5):e36877.

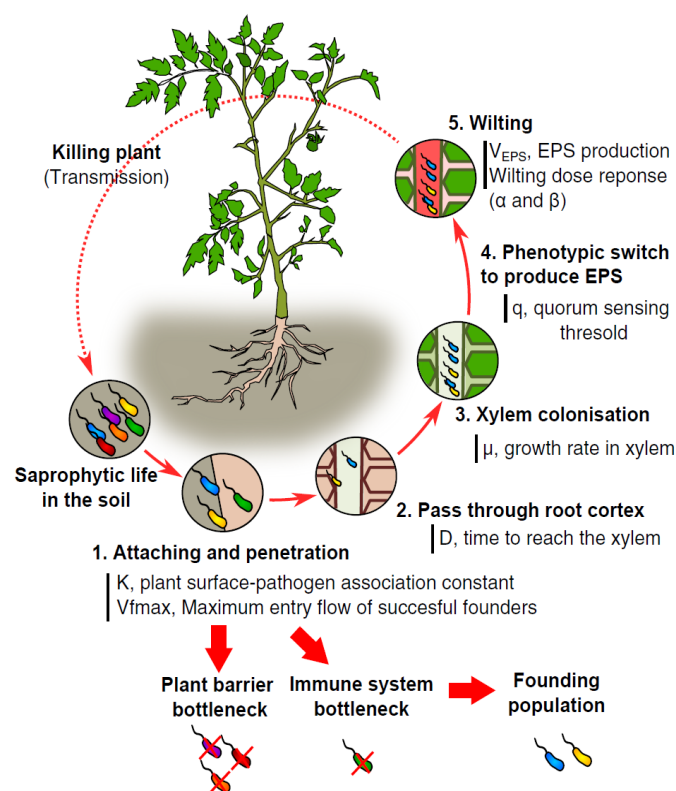

**Figure 1: The life cycle of plant pathogenic *Ralstonia sp.***

*Ralstonia sp.* lives in the soil, penetrates into the plant through the roots, pass the root cortex and then colonize the xylem vessels. When high bacterial densities are reached, a phenotypic switch is induced with production of exopolysaccharide (EPS). The xylem water flux is interrupted, promoting the wilting symptoms. After plant death, the bacteria returns to the soil where it will continue as a saphrophyte until a new host is infected.

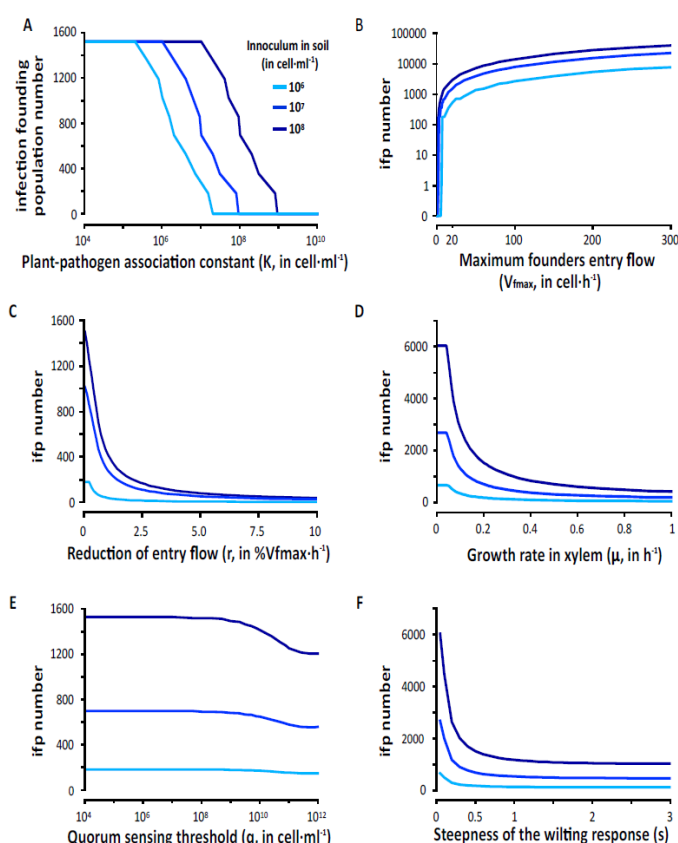

**Figure 2: Sensitivity of the infection bottleneck to different parameters of the infection cycle.**

Simulations were performed using the population dynamics model (see results) and by varying the different values of the model parameters  $K$  (panel A),  $V_{\max}$  (panel B),  $r$  (panel C),  $\mu$  (panel D),  $q$  (panel E),  $s$  (panel F), see the list Fig.1 and Appendix SI Fig. 2. Simulations were performed for 3 concentrations of bacterial soil inoculum,  $1 \cdot 10^6$ ,  $1 \cdot 10^7$  and  $1 \cdot 10^8$  cell·ml<sup>-1</sup>.

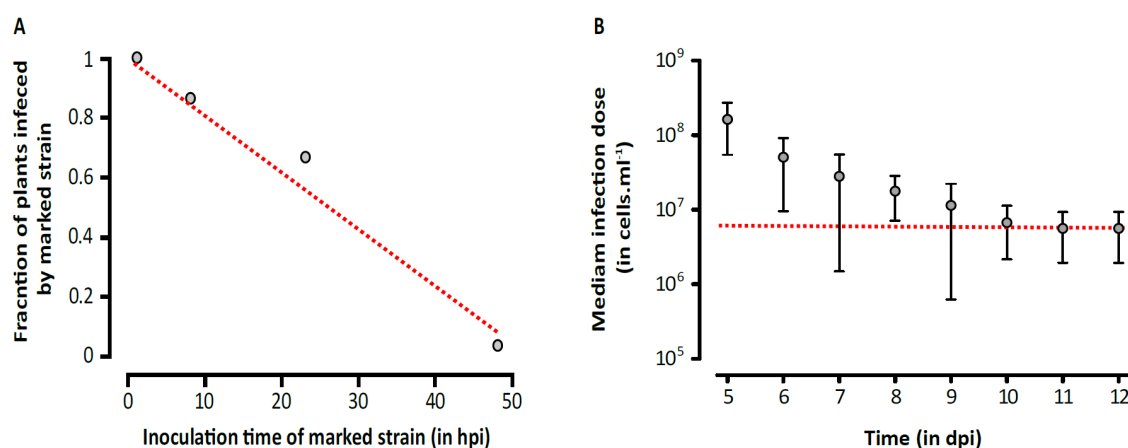

**Figure 3: Infectivity of *Ralstonia pseudosolanacearum* in tomato.**

(A) Tomato host is continuously infected by *R. pseudosolanacearum* within 48 hours. Plants were first inoculated with the wild type GM1000 strain and subsequently inoculated with the marked GRS540 strain (SI Fig. 1A) at 1, 8, 23 and 48 hours after the first inoculation. Bacterial load of these two strains were quantified at 5 dpi to obtain the fraction of GRS540 in final bacterial population. (B) The median infection dose (MID) of *R. pseudosolanacearum* in tomato following soil-drenching inoculation. Five 10 times dilution of *R. pseudosolanacearum* inoculums, volume of 500 ml per trial, were poured on each tray of 16 plants. Daily phenotyping was performed (SI Fig. 3) and the Reed-Muench method was adopted to determine the MID at each dpi. The red dotted line represent an asymptotic value at MID = 5.9 · 10<sup>6</sup> cells.



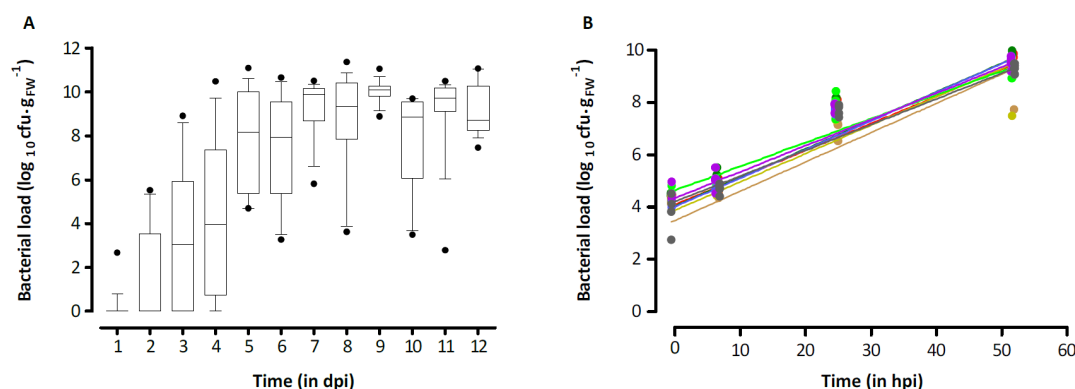

**Figure 4: Colonization dynamics of *Ralstonia pseudosolanacearum* in planta.**

(A) The bacterial load of individual tomato plants was assessed from 1 dpi to 12 dpi. Sixteen plants were analysed at each time-point (dpi). This experiment is representative of 3 biological replicates (Appendix SI Fig. 6). Bar represents the median of bacterial load in each group. (B) *In planta* growth of *R. solanacearum* after the stem injection inoculation. Samples were harvested at 0, 7, 25, 52 hpi. Thirty-two individual plants from 8 biological replicates were analysed. After growth curve fitting, the rate was determined at  $0.233 \pm 0.012 \text{ h}^{-1}$ ;  $R^2 = 0.937 \pm 0.024$  (mean  $\pm$  sd).

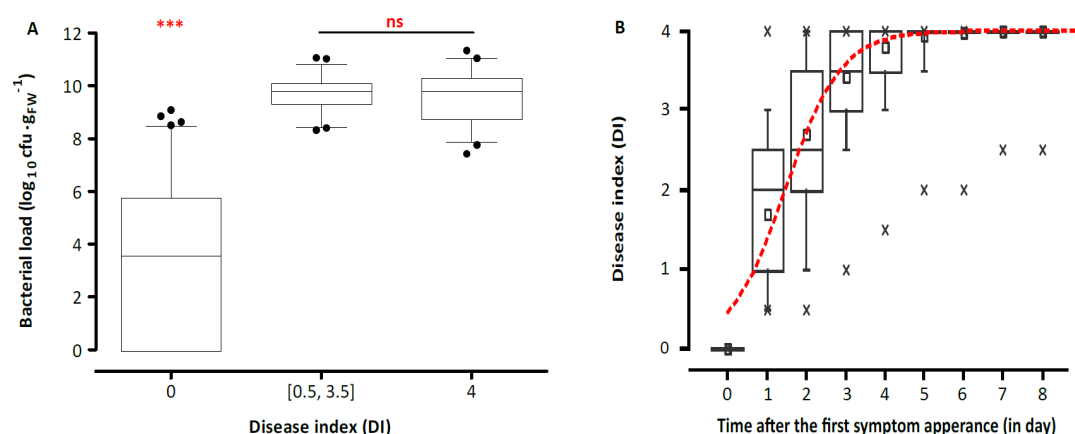

**Figure 5: Bacterial wilt disease dynamics.**

The data from Fig. 4A was used for this correlation analysis with three biological repeats (SI Fig. 7).

(A) Correlations of bacterial load and disease index (DI) in tomato. Box plots represent the median

and 5-95 percentiles in each DI group. \*\*\* indicates P-value < 0.0001, Mann-Whitney test, ns: P-

value > 0.05. (B) Time response curve of symptom onset (wilting) synchronized to the first day of the

symptom appearance for each individual plant.

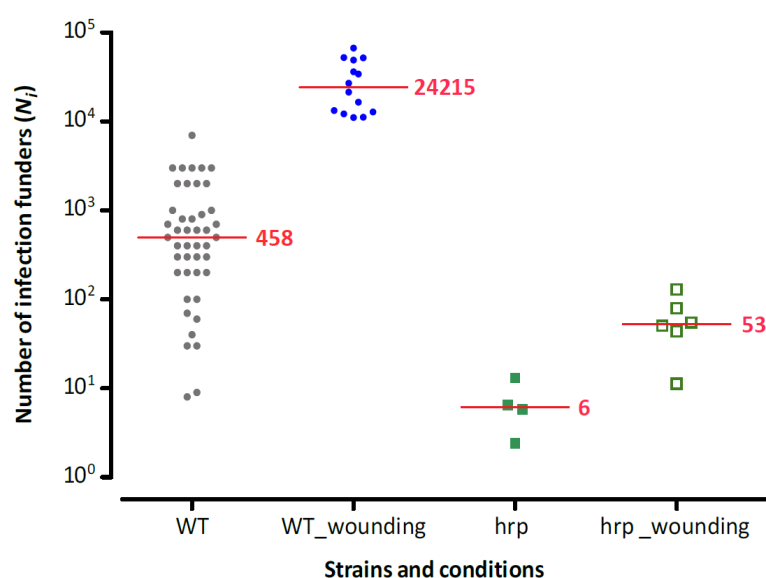

| P-value      | WT       | WT_wounding | hrp   |
|--------------|----------|-------------|-------|
| WT_wounding  | < 0.0001 |             |       |
| hrp          | 0.0014   | 0.0035      |       |
| hrp_wounding | 0.0032   | 0.0006      | 0.019 |

**Figure 6. Contribution of plant physical barriers and bacteria type III effectors to the infection bottleneck size.**

Wild type GMI1000 (grey dots) and *hrp* mutant GMI1694 (*hrp*, green squares) of *R. pseudosolanacearum* were harvested at 7 dpi and 10 dpi following root inoculation. GMI1000 wounding (WT-wounding, blue dots) and GMI1694 wounding (*hrp*\_wounding, green open squares) were harvested at 4 dpi and 7 dpi by wounding root inoculation. Each experimental condition can be distinguished from the others as indicated by the Mann-Whitney test P-values in the table.
